# 1 The Relationship between Parasitic Fleas and Small Mammals 2 in Household of Western Yunnan Province, China

3 Jia-Xiang Yin<sup>1,2\*</sup>, Xiao-Ou Cheng<sup>1,2</sup>, Qiu-Fang Zhao<sup>1,2</sup>, Zhao-Fei Wei<sup>1,2</sup>,  
4 Dan-Dan Xu<sup>1,2</sup>, Meng-Di Wang<sup>1,2</sup>, Yun Zhou<sup>1,2</sup>, Xiu-Fang Wang<sup>1,2</sup> and  
5 Zheng-Xiang Liu<sup>3</sup>

6  
7 <sup>1</sup>School of Public Health, Dali University, Dali, Yunnan Province 671000, P.R.  
8 China;

9 <sup>2</sup>Yunnan Provincial Key Laboratory of Entomological Biopharmaceutical R&D,  
10 Dali, Yunnan Province 671000, P.R. China;

11 <sup>3</sup>Yunnan Institute of Endemic Disease Control and Prevention, Dali, Yunnan  
12 Province 671000, P.R. China.

13 \*Corresponding author: chinayjx@hotmail.com

## 14 Abstract

15 The Yunnan Province has one of the most serious outbreaks of the plague  
16 epidemic in China. Small mammals and fleas are risk factors for the  
17 occurrence of plague in commensal plague foci. Understanding the  
18 relationship between parasitic fleas and small mammals will help control fleas  
19 and prevent the onset of the plague. Four hundred and twenty-one small  
20 mammals, belonging to 9 species, were captured. Of these, 170 small  
21 mammals (40.4%) were infested with fleas. A total of 992 parasitic fleas  
22 (including 5 species) was collected. The number of *Leptopsylla Segnis* and  
23 *Xenopsylla Cheopis* was 91.0%. The final multiple hurdle negative binomial  
24 regression model showed that when compared with *Rattus Tanezumi*, the  
25 probability of flea infestation on *Mus musculus* and other host species  
26 decreased from 58% to 99%, while the infestation with fleas from other host  
27 species increased 4.7 fold. The probability of flea prevalence in adult hosts  
28 increased by 74%, while the number of fleas decreased by 76%. The number  
29 of flea infestations in small male mammals increased by 62%. The number of

fleas in small mammals weighing more than 59 grams has been multiplied by about 4. *Rattus Tanezumi* is the predominant species in households in West Yunnan Province, while *Leptopsylla Segnis* and *Xenopsylla Cheopis* are dominant parasitic fleas. There is a strong relationship between the abundance of parasitic fleas and the characteristics of small mammals (e.g. Species, age, sex, and body weight).

**Keywords:** Small Mammal; Parasitic Flea; Household; Western Yunnan Province.

## Introduction

Plague is a zoonotic bacterial infectious disease transmitted by fleas with reservoirs in rodent populations, in which the parasitic flea plays a potentially fundamental role as bridge vectors to transmit the bacteria (*Yersinia pestis*) to animals and humans [1]. The potential role of fleas as carriers and host-supported local reservoirs can help explain the persistence of plague [2].

The plague has played a huge role in human history and is still prevalent in most parts of China. In China, animal plague is reported almost every year, and occasional human plagues occur [3, 4]. Transmission to humans sometimes occurs through contact with fleas that have fed on an infected small mammal or by skinning infected small mammals (e.g. Marmot) [5-7]. The province of Yunnan is one of the most serious plague epidemic foci in China [8,9], and especially the most active in commensal rodent plague foci [2]. The province of Yunnan is characterized by complex natural conditions, an obvious vertical climate, consisting of embedded microhabitats that create a series of ecological niches, which may increase the risk of establishing vectors and specific hosts that carry pathogens.

Fleas are obligatory hematophagous insects and rodents are the most common host of fleas, although they can appear in other types of mammals

and birds [10, 11]. At different stages of the life cycle, fleas are located in the hosts or in the host's nest. In most cases, the imago flea is usually parasitic on the host and until the end of its life cycle, differentiating with the larvae. When leaving a pupa, a new flea of imago finds a host because the reproduction of the flea is not possible without the feeding of blood [12]. Therefore, it is likely to handle flea infestations on live hosts. The parasites get their food and other biological supplies from their hosts. Consequently, they can affect the host directly by reducing host resources, and indirectly by provoking behavioral responses [13, 14] or immunological responses [1, 15]. Fleas with high density and richness not only favor the bacteria plague, but also spread widely among the hosts, but also suppress the immune response of the hosts, thus improving the susceptibility of the hosts [16, 17], which is vital for the maintenance of the plague [18, 19].

The abundance of hosts is an important factor that affects the distribution and abundance of parasites. In terms of the reservoir, some individuals, populations or host species are characterized by a higher level of parasite infestation than others [20]. It is well known that there is a great variation in the abundance of a parasite among the different host species. The host with the highest abundance of parasites is commonly defined as the main host, while those with lower abundance of parasites are defined as auxiliary hosts [20, 21].

In this study, we attempt to describe the distribution of small parasitic mammals and fleas and reveal the effect of small mammals on the abundance of parasites in homes in the western province of Yunnan. The information on the factors that affect the flea abundance in hosts is essential to provide evidence-based recommendations on flea control and to implement plague control and prevention programs in natural plague foci.

## Methods

### Description of the study area

The western of Yunnan province is located in the central region of the Hengduan mountains of the terrestrial part of the Tibetan plateau, which belongs to the low latitude mountain valley. It is influenced by the enormous difference in latitude and altitude gradient, which is characterized by complex terrain and varied climate [22]. Therefore, it is one of the regions that possess the most abundant animal and plant species in China. There are many minority nationalities, including Yi, Dai, Naxi, Hui, Bai et al. inhabiting this area. The main economic source is planting and economic development is relatively poor. These conditions contribute to the breeding of small mammals and the spread of the plague.

During the period from July 2011 to October 2012, the study was carried out in 800 households in 40 villages, 10 counties, in the western part of Yunnan province (Fig 1). In the study area, the 10 counties have a total area of approximately 41,130 square kilometers and a population of approximately 3.4 million.

### Fig 1 here

### Small mammals capture and identification

Five live traps were placed in each home for three continuous nights to capture small mammals. The bait was fried ham sausage. Each live trap was verified on the morning of the next day. If a small mammal was caught, a new live trap with fresh bait was replaced by the old live trap and placed in the same place. The species of small mammals, sex and age were identified according to their morphological characteristics. Their weight, body length and tail length were measured.

### Parasitic flea collections and identification

The parasitic fleas were harvested by combing from the tail end forward using

a toothbrush in a white enamel tray after anesthetizing small mammals with ether. The parasitic fleas were stored in labeled vials containing 75% ethanol. Fleas from each small mammal were kept in separate vials and kept at room temperature. Flea species were identified under a light microscope.

## **Data analysis**

The distribution of small parasitic mammals and fleas was summarized using descriptive statistics. Then the abundance of parasitic fleas of each small mammal was generated. Species, sex, age, weight, body length and tail length of each small mammal were considered potential factors for the abundance of parasitic fleas. For continuous variables, the median was used to classify these variables into binary variables. The relationship between potential factors and a result was explored using the hurdle binomial regression model (HNB) of the regression model under R software 3.02 [23-25]. This regression model was applied to take into account the current data set that shows a count of excess zeros and an overdispersion distribution. It is a two-component model: one is the logistic model adjusting counts against zero, the other is the hurdle binomial model adjusting positive counts. Potential factors ( $P < 0.20$ ) related to small mammals entered the prototype multiple regression model HNB. The final model to predict the factors associated with the parasitic flea abundance was refined using a backward method ( $\alpha = 0.10$  as a criterion of statistical significance). The proportion of Prevalence odds ratio (OR) and abundance ratio (AR) for a parasitic infestation of fleas were calculated based on pieces of literature [26,27].

## **Results**

### **Distribution and description of small mammals**

A total of 12,000 traps was placed in 800 households in 40 villages in 10 counties in western Yunnan Province and 421 small mammals were captured. The overall density of small mammals was 3.51%. Small mammals were

divided into 9 species, 6 genera, 2 families and 2 orders (Table 1). *Rattus*  
*Tanezumi* is the dominant species and it represents 66.03% (278/421) of the  
entire sample. Among the 10 counties, the highest number and the smallest  
number of small mammals were captured in Mangshi (100) and Deqin (16)  
counties, respectively. The number of small mammals richness was 9. The  
highest number and lowest number of richness were in Yongren (5), Nanhua  
(1) and Deqin (1) counties, respectively.

#### **Table 1 Here**

In our study, the weight, body length and tail length of 407 small mammals  
were calculated (for other 14 small mammals there was no calculation due to  
incomplete data). The mean body weight was 62.93g, standard deviation  
42.67g, median 59.31g (range: 7.39-186.89g); the average body length was  
22.79cm, the standard deviation of 8.57cm and the median 21.00cm (range:  
7.50 to 39.30cm); the average length of the tail was 12.30cm, the standard  
deviation of 3.76cm and the median 13.30cm (extremes: 1.00 and 20.00cm).

#### **Distribution of parasitic fleas**

Of 421 small mammals, 170 small mammals were infested with fleas and their  
prevalence was 40.38%. A total of 992 parasitic fleas, divided into 5 species, 5  
genera, and 3 families, were collected and the flea value was 2.36 (992/421).  
The highest prevalence of fleas and the highest flea index occurred in Yunxian  
County (71.79%) and Yulong County (7.33), respectively. Out of 992 fleas, the  
number of *Xenopsylla cheopis* and *Leptopsylla segnis* was 903, or 91.03%.  
The proportion of *Xenopsylla cheopis* exceeds 90% in Yunxian and Gengma  
counties. (Table 2)

#### **Table 2 Here**

Among the 9 small mammal species, the prevalence of *Rattus Tanezumi* fleas  
was highest (53.60%, 149/278). The infestation of *Rattus Tanezumi* by  
*Xenopsylla cheopis* was particularly high (35.61%, 99/278). *Crocidura*

168 *attenuata* and *Anourosorex squamipes* were not infested with fleas (Table 3).

### 169 **Table 3 Here**

#### 170 **The results of the prototype multiple HNB regression model**

171 Table 4 shows the prototype multiple HNB regression model for the  
172 abundance of parasitic fleas. Of the six potential factors compared to *Rattus*  
173 *Tanezumi*, the probability of flea infestation of *Mus musculus* and other host  
174 species decreased, while the number of flea infestations of other host species  
175 increased. The number of fleas in adult hosts decreased; the number of fleas  
176 in small mammals weighing more than 59 grams increased.

### 177 **Table 4 here**

#### 178 **The results of the final multiple HNB regression model**

179 The final model showed that four factors - species, age, sex and body weight  
180 of small mammals - are closely associated with the abundance of parasitic flea  
181 (Table 5). Compared to *Rattus Tanezumi*, the probability of infestation with  
182 *Mus musculus* fleas as well as other host species decreased by 58% to 99%,  
183 while the number of flea infestations of the other host species increased by  
184 4.71. The probability of flea prevalence in adult hosts increased by 74%, while  
185 the number of fleas decreased by 76%. The number of flea infestations in  
186 small male mammals increased by 62%. The number of fleas in small  
187 mammals weighing more than 59 grams increased by about 4 times.

### 188 **Table 5 here**

## 189 **Discussion**

190 In this study, 421 small mammals were captured and *Rattus Tanezumi* was the  
191 predominant species. A total of 992 parasitic fleas was collected from small  
192 mammals. The number of *Leptopsylla segnis* and *Xenopsylla cheopis* was  
193 91.03%. A close relationship between parasitic flea abundance and small  
194 mammal traits (including species, age, body weight, sex) was evident in  
195 households in Western Yunnan Province.

196 The results of our investigation showed that *Rattus Tanezumi* is the  
 197 predominant species in households in western Yunnan Province. *Xenopsylla*  
 198 *cheopis* and *Leptopsylla segnis* are the dominant fleas host as well as the  
 199 dominant fleas host of *Rattus Tanezumi*. These results correspond to the  
 200 previous study [28]. In the commensal plague foci of the western Yunnan  
 201 Province, *Rattus Tanezumi* is the main host species, while *Mus musculus* is  
 202 the auxiliary host species. Yin et al. [26] have suggested that the abundance of  
 203 parasitic fleas is related to host species. Our data indicated that *Rattus*  
 204 *Tanezumi* was more likely to be infested with fleas than *Mus musculus* and  
 205 other species. The main host may or may not be the species in which the  
 206 parasite evolved for the first time, but it's currently home to most individuals in  
 207 the parasite population [21]. It is therefore believed that *Rattus Tanezumi* is the  
 208 best species in which the majority of parasites live and the probability of flea  
 209 infestation on *Mus musculus* as well as other species has decreased  
 210 compared to *Rattus Tanezumi*. The reason for the increase in the number of  
 211 fleas in other species could be due to the fact that the number of flea  
 212 infestations on other species was sufficient, although the number of other host  
 213 species is lower in other species in our study, like *Apodemus chevrieri*. In  
 214 addition, the fundamental reasons for the diversity in parasitic abundance  
 215 between the main host and any auxiliary host are often related to the different  
 216 successes of exploitation and reproduction of a parasite [29]. Previous studies  
 217 have shown that the phylogenetic correlation between the main host and the  
 218 auxiliary host can determine parasitic abundance on its auxiliary hosts, as it  
 219 should reflect the similarities between host species in terms of physiological,  
 220 ecological characteristics and immunological [30]. On the other hand, it was  
 221 found that for flea infestation in small mammals, the abundance of a flea on its  
 222 auxiliary hosts decreased with increasing phylogenetic distance of these hosts  
 223 relative to the main host [30]. The mechanisms underlying this model are not  
 224 yet clear but are supposed to be consistent with the differential performance of



225 a flea on auxiliary hosts, which in turn is correlated with a phylogenetic  
226 distance from the auxiliary host to the main host [31].

227 Recent studies have shown that parasites appear to make favorable choices  
228 and decisions for hosts in which their reproductive benefits are maximized [32].  
229 In the meantime, the choice of the host is important, which may contribute to  
230 the variation in the abundance of the fleas collected when the potential risk of  
231 flea-mediated diseases are assessed. In addition, the variation in the level of  
232 infection in host individuals is well known, indicating that some individuals may  
233 represent better patches for parasites than other individuals [20]. Namely,  
234 reservoirs providing better patches for parasites are usually defined as primary  
235 hosts.

236 Differences in flea infestation due to the age of the host may be influenced by  
237 differences in parasite aggregation. We tested the effect of age of small  
238 mammals on parasitic fleas and found that the probability of flea prevalence in  
239 adult hosts increased as the number decreased. This phenomenon has  
240 generally been linked to host immune responses and parasite-host  
241 associations. Firstly, it is known that immune defenses often deteriorate with  
242 increasing age [33], so that in smaller mammals the decline of antiparasitic  
243 defense has been reported with increasing age [34]. These hosts have  
244 different defenses that can affect the number of blood a flea can acquire [35].  
245 Fleas were found to take more blood from juveniles and older animals than  
246 from sub-adult and adult animals [36]. The degree of deterioration of immune  
247 function with age may, however, be affected by environmental conditions (e.g.  
248 environmental stress) [37] and may also differ between males and females  
249 (due to faster aging of men) [38]. Secondly, differential parasite abundance in  
250 hosts belonging to different age cohorts has been reported for various host  
251 and parasite taxa [39-41]. However, the influence of host age on the  
252 distribution pattern of parasite abundance differs among different host-parasite

associations. In some host-parasite associations, the abundance of parasites increases with the age of the host [39], while in other associations it increases or decreases in the youngest and oldest hosts compared to hosts of median age (called "adult hosts")[40]. In fact, acquired resistance against parasites may be lower in young or old hosts than in median-age hosts. Young hosts may simply not have the time to develop parasite resistance, while older hosts may lose their ability to resist parasites due to immunosenescence [33, 42, 43]. As a result, hosts in the youngest and the oldest cohorts would have better habitat for parasites, so the relationship between parasite abundance and host age would be convex. If the negative effect of heavy parasite loads causes mortality mainly in young instead of old hosts, the abundance of parasites will increase with the age of the host. In all cases, fleas performed better in younger and older hosts than in middle-aged hosts.

In addition, the effect of the age of the host was strongly influenced by the effect of the sex of the host. In particular, from the point of view of resource acquisition (i.e. The size of the blood meal), there has been an improvement in the quality of cohorts of young and old among female, but not in male hosts, while, in the context of resource processing (digestion of blood), some trends in age-dependent host quality has been observed in male but not in female hosts [35]. In other words, the results of the Liberman study suggest that the age of the host does not predict unequivocally whether it is more or less beneficial for a flea [36].

Similarly, the sex of the host was also a determining factor influencing the abundance of fleas. Previous studies have shown the effect of host sex in flea reproduction [44,45]. In this study, we studied the consequences of host sex on flea abundance. Finally, we observed an increase in the number of flea infestations in small male mammals compared to females. The effect of host sex on parasite performance is essential to understanding the mechanisms of

281 male-biased parasitism.

282 Under normal conditions, two non-mutually exclusive mechanisms are invoked  
 283 to explain the variation in the number of fleas observed. Male hosts are  
 284 characterized by higher mobility and poorer immunological defense than  
 285 female. In general, fleas feed faster, take relatively more blood and digest  
 286 more quickly when feeding on male rather than female, although the pattern of  
 287 blood digestion related to the sex of the host depends on external conditions  
 288 (relative humidity). In addition, fleas produced more eggs exploiting male hosts  
 289 than female hosts [44]. This would lead to a better ability of parasites exploiting  
 290 male rather than female because of the immunosuppressive effects of  
 291 androgens, which would lead to fleas favoring male [45]. It is suggested that, in  
 292 many cases, male hosts represent better patches for parasites than females.  
 293 Thus, it can be seen that more flea prefers to stay in male hosts than in  
 294 females. Consequently, a greater infestation of a male host than a female host  
 295 in terms of abundance, prevalence and species richness of parasites, this has  
 296 been reported for a wide variety of parasite and host taxa [46], although higher  
 297 levels of parasite infection have been reported in some mammalian female  
 298 [47].

299 The body weight of the hosts could be considered as an additional indicator of  
 300 the number of fleas assembled. The results of this study showed that the  
 301 number of fleas increased in small mammals weighing more than 59 grams.  
 302 Hawlena [48] noted that the number of fleas, mainly *Xenopsylla cheopis* and  
 303 *Xenopsylla Astia* (Siphonaptera: Pulicidae), caught in the wild (Rodentia:  
 304 Muridae) increased with the weight of the host (and thus its age) at an optimum  
 305 before decreasing. In practice, the body weight of the host increases with age.  
 306 As mentioned above, the probability of flea infestation on the host increases  
 307 with the age of the host. Therefore, the number of fleas would increase with the  
 308 body weight of the host.

Associations between the aggregation of fleas and the abundance of their hosts vary according to different factors. This study confirmed that the variation in the number of fleas was due to different factors in the host.

It is concluded that the host is an important factor to consider when comparing parasite flea variation in natural rodent populations. It is necessary that the factors mentioned above be taken into account to control the abundance of parasitic fleas. Fitness related measures should be directly involved, such as reducing the number of small mammals and flea fleas, preventing and controlling flea-borne diseases.

## Conclusions

The results of the study show the distribution of small mammals and household parasitic fleas in the western province of Yunnan, China. In addition, a new discovery revealed by the hurdle binomial regression model is that there is a close relationship between the abundance of parasitic fleas and the characteristics of small mammals (e.g. species, age, sex, and body weight). Our study provides direct evidence to explore the relationship between parasitic fleas and the host by the characteristic of instinct and to reveal host structure plays an important role in the allocation of parasitic flea abundance in the ecosystem of the plague. The knowledge of parasitic flea factors will help control and predict the number of parasitic fleas in commensal rodent plague foci and further control the onset of the plague. Although it is relatively limited that the current model predicts the factors affecting the abundance of parasitic fleas. In addition to the characteristics of the host, the number of parasitic fleas may be affected by other potential factors (e.g. environment, climate, economy, human disturbance). Thus, the above factors should be measured and included in the regression model, it would be useful to establish benefits model to predict the abundance of parasitic fleas.

## Acknowledgment

337 The work was supported by the National Natural Science Foundation of China  
338 (No. 81460485; No. 81860565).

## 339 References

- 340 1. Gallizzi K, Alloitteau O, Harrang E, Richner H. Fleas, parental care, and  
341 transgenerational effects on tick load in the great tit. *Behav Ecol*. 2008;  
342 19(6):1225-34. <https://doi.org/10.1093/beheco/arn083>.
- 343 2. Gage KL. Factors affecting the spread and maintenance of plague. *Adv*  
344 *Exp Med Biol*. 2012; 954:79-94.  
345 [https://doi.org/10.1007/978-1-4614-3561-7\\_11](https://doi.org/10.1007/978-1-4614-3561-7_11).
- 346 3. Yin JX, Dong XQ, Liang Y, Wang P, Siriarayaporn P, Thaikruea L.  
347 Human plague outbreak in two villages, Yunnan Province, China, 2005.  
348 *Southeast Asian J Trop Med Public Health*. 2007; 38(6):1115-9.
- 349 4. Cai WF, Zhang FX, Wang GL. Structure and community diversity of small  
350 mammals in plague natural focus of Yulong County and Gucheng District.  
351 *Chin J Ctr Endem Dis*. 2015; 30:333-5.
- 352 5. Stenseth NC, Atshabar BB, Begon M, Belmain SR, Bertherat E, Carniel  
353 E, et al. Plague: past, present, and future. *PLoS Medicine*. 2008; 5(1):e3.  
354 <https://doi.org/10.1371/journal.pmed.0050003>.
- 355 6. Liang XC, Wang DS. Analysis of epidemic situation of Marmota  
356 himalayana plague natural focus in Gansu Province. *Bull Dis Ctr Prev*.  
357 2011; 26(1):38-48.
- 358 7. Bai LQ, Wang JJ, Si XY. Overview of the Surveillance of Rodent  
359 Populations From 2001 to 2011 in Inner Mongolia. *Inner Mongolia Med*.  
360 2014; 46(7):826-9.
- 361 8. Yin JX, Geater A, Chongsuvivatwong V, Dong XQ, Du CH, Zhong YH, et  
362 al. Predictors for presence and abundance of small mammals in  
363 households of villages endemic for commensal rodent plague in Yunnan  
364 Province, China. *BMC ecology*. 2008; 8:18.  
365 <https://doi.org/10.1186/1472-6785-8-18>.
- 366 9. Li JY, Zhao WH, Dong XQ, Liang Y, Hong M. Analysis on the current  
367 status of plague epidemics for *Rattus flavipectus* plague natural foci in  
368 Yunnan province. *Chin J Endemiol*. 2006; 25(6):654-7.
- 369 10. Otranto D, Dantas-Torres F, Napoli E, Solari Basano F, Deuster K,  
370 Pollmeier M, et al. Season-long control of flea and tick infestations in a  
371 population of cats in the Aeolian archipelago using a collar containing  
372 10% imidacloprid and 4.5% flumethrin. *Vet Parasitol*. 2017; 248:80-3.  
373 <https://doi.org/10.1016/j.vetpar.2017.10.023>.
- 374 11. Lawrence AL, Hii S-F, Jirsová D, Panáková L, Ionică AM, Gilchrist K, et  
375 al. Integrated morphological and molecular identification of cat fleas  
376 (*Ctenocephalides felis*) and dog fleas (*Ctenocephalides canis*) vectoring

- 377 Rickettsia felis in central Europe. Vet Parasitol. 2015; 210(3/4):215-23.  
378 <https://doi.org/10.1016/j.vetpar.2015.03.029>.
- 379 12. Krasnov BR. Functional and Evolutionary Ecology of Fleas:a Model for  
380 Ecological Parasitology Cambridge University Press: Cambridge, UK;  
381 2008.
- 382 13. Giorgi MS, Arlettaz R, Christe P, Vogel P. The energetic grooming costs  
383 imposed by a parasitic mite (Spinturnix myoti) upon its bat host (Myotis  
384 myotis). Proc Biol Sci. 2001; 268(1480):2071-5.  
385 <https://doi.org/10.1098/rspb.2001.1686>.
- 386 14. Sánchez S, Gómez MS. Xenopsylla spp. (Siphonaptera: Pulicidae) in  
387 murid rodents from the Canary Islands: An update. Parasite. 2012;  
388 19(4):423-6. <https://doi.org/10.1051/parasite/2012194423>.
- 389 15. Rouault E, Lecoœur H, Meriem AB, Minoprio P, Goyard S, Lang T.  
390 Imaging visceral leishmaniasis in real time with golden hamster model:  
391 Monitoring the parasite burden and hamster transcripts to further  
392 characterize the immunological responses of the host. Parasitol Int. 2017;  
393 66(1):933-9. <https://doi.org/10.1016/j.parint.2016.10.020>.
- 394 16. Schmid-Hempel P, Ebert D. On the evolutionary of specific immune  
395 defence. Trends Ecol Evol. 2003; 18:27-32.
- 396 17. Khokhlova IS, Spinu M, Krasnov BR, Degen AA. Immune response to  
397 fleas in a wild desert rodent: effect of parasite species, parasite burden,  
398 sex of host and host parasitological experience. J Exp Biol. 2004;  
399 207(16):2725-33. <https://doi.org/10.1242/jeb.01090>.
- 400 18. Lorange EA, Race BL, Sebbane F, Hinnebusch BJ. Poor vector  
401 competence of fleas and the evolution of hypervirulence in Yersinia  
402 pestis. J Infect Dis. 2005; 191(11):1907-12.  
403 <https://doi.org/10.1086/429931>.
- 404 19. Eisen RJ, Bearden SW, Wilder AP, Montenieri JA, Antolin MF, Gage KL.  
405 Early-phase transmission of Yersinia pestis by unblocked fleas as a  
406 mechanism explaining rapidly spreading plague epizootics. Proc Natl  
407 Acad Sci U S A. 2006; 103(42):15380-5.  
408 <https://doi.org/10.1073/pnas.0606831103>.
- 409 20. Poulin R. Evolutionary Ecology of Parasites: From Individuals to  
410 Communities. Princeton University Press: Princeton,U S A.; 2007.
- 411 21. Poulin R. Relative infection levels and taxonomic distances among the  
412 host species used by a parasite: insights into parasite specialization.  
413 Parasitology. 2005; 130(1):109-15.
- 414 22. Feng JM, Xu CD. Geographical distribution patterns of zonal plant  
415 community species diversity in Western Yunnan, China. Chin J Ecol.  
416 2009; 28(4):595-600.
- 417 23. Zeileis A, Kleiber C, Jackman S. Regression Models for Count Data in R.  
418 J Stat Softw. 2008; 27(8):1-25.
- 419 24. Baughman AL. Mixture model framework facilitates understanding of  
420 zero-inflated and hurdle models for count data. J Biopharm Stat. 2007;



- 17(5):943-6. <https://doi.org/10.1080/10543400701514098>.
25. Yin JX, Dong XQ. Application of Hurdle Model in Identifying Predictors for Flea Abundance on Rats. *Endem Dis Bull.* 2010; 25(5):1-4.
26. Yin JX, Geater A, Chongsuvivatwong V, Dong XQ, Du CH, Zhong YH. Predictors for abundance of host flea and floor flea in households of villages with endemic commensal rodent plague, Yunnan Province, China. *PLoS Negl Trop Dis.* 2011; 5(3):e997. <https://doi.org/10.1371/journal.pntd.0000997>.
27. Yin JX, Zhong YH, Du CH, Dong XQ, Yang SH. Predictors for abundance of *Rattus tanezumi* in households of commensal rodent plague foci. *Zhonghua liuxingbingxue zazhi.* 2013; 34(2):157-9.
28. Wu AG, Li TY, Feng JM, Dong XQ. Study on the epidemiological significance related to community-structural difference of the rat plague host and vectors in Western Yunnan, China. *Zhonghua liuxingbingxue zazhi.* 2008; 29(4):346-50.
29. Krasnov BR, Sarfati M, Arakelyan MS, Khokhlova IS, Burdelova NV, Degen AA. Host specificity and foraging efficiency in blood-sucking parasite: feeding patterns of the flea *Parapulex chephrenis* on two species of desert rodents. *Parasitol Res.* 2003; 90(5):393-9. <https://doi.org/10.1007/s00436-003-0873-y>.
30. Krasnov BR, Shenbrot GI, Khokhlova IS, Poulin R. Relationships between parasite abundance and the taxonomic distance among a parasite's host species: an example with fleas parasitic on small mammals. *Int J Parasitol.* 2004; 34(11):1289-97. <https://doi.org/10.1016/j.ijpara.2004.08.003>.
31. Khokhlova IS, Fielden LJ, Degen AA, Krasnov BR. Digesting blood of an auxiliary host in fleas: effect of phylogenetic distance from a principal host. *J Exp Biol.* 2012; 215(8):1259-65. <https://doi.org/10.1242/jeb.066878>.
32. Krasnov BR, Khokhlova IS, Shenbrot GI. Density-dependent host selection in ectoparasites: an application of isodar theory to fleas parasitizing rodents. *Oecologia.* 2003; 134(3):365-72. <https://doi.org/10.1007/s00442-002-1122-2>.
33. Gruver AL, Hudson LL, Sempowski GD. Immunosenescence of ageing. *J Pathol.* 2007; 211(2):144-56. <https://doi.org/10.1002/path.2104>.
34. Body G, Ferte H, Gaillard JM, Delorme D, Klein F, Gilot-Fromont E. Population density and phenotypic attributes influence the level of nematode parasitism in roe deer. *Oecologia.* 2011; 167(3):635-46. <https://doi.org/10.1007/s00442-011-2018-9>.
35. Liberman V, Khokhlova IS, Degen AA, Krasnov BR. Reproductive consequences of host age in a desert flea. *Parasitology.* 2013; 140(4):461-70. <https://doi.org/10.1017/s0031182012001904>.
36. Liberman V, Khokhlova IS, Degen AA, Krasnov BR. The effect of host age on feeding performance of fleas. *Parasitology.* 2011; 138(9):1154-63.

- 465 <https://doi.org/10.1017/s0031182011000758>.
- 466 37. Hayward AD, Wilson AJ, Pilkington JG, Pemberton JM, Kruuk LE. Ageing  
467 in a variable habitat: environmental stress affects senescence in parasite  
468 resistance in St Kilda Soay sheep. *Proc Biol Sci.* 2009;  
469 276(1672):3477-85. <https://doi.org/10.1098/rspb.2009.0906>.
- 470 38. Clutton-Brock TH, Isvaran K. Sex differences in ageing in natural  
471 populations of vertebrates. *Proc Biol Sci.* 2007; 274(1629):3097-104.  
472 <https://doi.org/10.1098/rspb.2007.1138>.
- 473 39. Fichet-Calvet E, Wang J, Jomaa I, Ben Ismail R, Ashford RW. Patterns of  
474 the tapeworm *Raillietina trapezoides* infection in the fat sand rat  
475 *Psammomys obesus* in Tunisia: season, climatic conditions, host age  
476 and crowding effects. *Parasitology.* 2003; 126(5):481-92.
- 477 40. Krasnov BR, Stanko M, Morand S. Age-dependent flea (Siphonaptera)  
478 parasitism in rodents: a host's life history matters. *J Parasitol.* 2006;  
479 92(2):242-8. <https://doi.org/10.1645/ge-637r1.1>.
- 480 41. Alarcos AJ, Timi JT. Parasite communities in three sympatric flounder  
481 species (Pleuronectiformes: Paralichthyidae): similar ecological filters  
482 driving toward repeatable assemblages. *Parasitol Res.* 2012;  
483 110(6):2155-66. <https://doi.org/10.1007/s00436-011-2741-5>.
- 484 42. Johansen CE, Lydersen C, Aspholm PE, Haug T, Kovacs KM. Helminth  
485 parasites in ringed seals (*Pusa hispida*) from Svalbard, Norway with  
486 special emphasis on nematodes: variation with age, sex, diet, and  
487 location of host. *J Parasitol.* 2010; 96(5):946-53.  
488 <https://doi.org/10.1645/ge-1685.1>.
- 489 43. Praet N, Speybroeck N, Rodriguez-Hidalgo R, Benitez-Ortiz W, Berkvens  
490 D, Brandt J, et al. Age-related infection and transmission patterns of  
491 human cysticercosis. *Int J Parasitol.* 2010; 40(1):85-90.  
492 <https://doi.org/10.1016/j.ijpara.2009.07.007>.
- 493 44. Khokhlova IS, Serobyann V, Degen AA, Krasnov BR. Host gender and  
494 offspring quality in a flea parasitic on a rodent. *J Exp Biol.* 2010;  
495 213(19):3299-304. <https://doi.org/10.1242/jeb.046565>.
- 496 45. Khokhlova IS, Serobyann V, Krasnov BR, Degen AA. Is the feeding and  
497 reproductive performance of the flea, *Xenopsylla ramesis*, affected by the  
498 gender of its rodent host, *Meriones crassus*? *J Exp Biol.* 2009;  
499 212(10):1429-35. <https://doi.org/10.1242/jeb.029389>.
- 500 46. Patterson JE, Neuhaus P, Kutz SJ, Ruckstuhl KE. Patterns of  
501 ectoparasitism in North American red squirrels (*Tamiasciurus*  
502 *hudsonicus*): Sex-biases, seasonality, age, and effects on male body  
503 condition. *Int J Parasitol Parasites Wildl.* 2015; 4(3):301-6.  
504 <https://doi.org/10.1016/j.ijppaw.2015.05.002>.
- 505 47. Krasnov BR, Morand S, Hawlena H, Khokhlova IS, Shenbrot GI.  
506 Sex-biased parasitism, seasonality and sexual size dimorphism in desert  
507 rodents. *Oecologia.* 2005; 146(2):209-17.  
508 <https://doi.org/10.1007/s00442-005-0189-y>.



509 48. Hawlena H, Khokhlova IS, Abramsky Z, Krasnov BR. Age, intensity of  
 510 infestation by flea parasites and body mass loss in a rodent host.  
 511 Parasitology. 2006; 133(2):187-93.  
 512 <https://doi.org/10.1017/s0031182006000308>.

### 513 **Figure legend**

514 Figure 1 Location of 10 sampling sites in Western Yunnan Province, China.  
 515 Ten red dots represent 10 sampling counties and yellow shadow is the  
 516 acreage of each county. Red five-point star is the location of Kunming city  
 517 (capital of Yunnan Province).

**Table 1    Distribution for small mammals in households of 10 counties in Western Yunnan Province**

| County   | Small mammals |         |          | Species and proportion (%) of small mammals |                 |                   |                |                |                  |                  |                    |               |
|----------|---------------|---------|----------|---------------------------------------------|-----------------|-------------------|----------------|----------------|------------------|------------------|--------------------|---------------|
|          | Abundance     | Density | Richness | <i>Rattus</i>                               | <i>Mus</i>      | <i>Rattus</i>     | <i>Rattus</i>  | <i>Suncus</i>  | <i>Apodemus</i>  | <i>Crocidura</i> | <i>Anoro sorex</i> | <i>Mus</i>    |
|          |               |         |          | <i>Tanezumii</i>                            | <i>musculus</i> | <i>norvegicus</i> | <i>Nitidus</i> | <i>Murinus</i> | <i>Chevrieri</i> | <i>Attenuata</i> | <i>squamipes</i>   | <i>caroli</i> |
| Yongren  | 86            | 7.17    | 5        | 4(4.65)                                     | 73(84.88)       | 2(2.33)           | 6(6.98)        | 0              | 0                | 0                | 0                  | 1(1.16)       |
| Nanhua   | 36            | 3.00    | 1        | 36(100.00)                                  | 0               | 0                 | 0              | 0              | 0                | 0                | 0                  | 0             |
| Xiangyun | 41            | 3.42    | 3        | 18(43.90)                                   | 0               | 22(53.66)         | 0              | 1(2.44)        | 0                | 0                | 0                  | 0             |
| Yunxian  | 39            | 3.25    | 2        | 37(94.87)                                   | 2(5.13)         | 0                 | 0              | 0              | 0                | 0                | 0                  | 0             |
| Gengma   | 26            | 2.17    | 2        | 25(96.15)                                   | 1(3.85)         | 0                 | 0              | 0              | 0                | 0                | 0                  | 0             |
| Mangshi  | 100           | 8.33    | 2        | 94(94.00)                                   | 0               | 0                 | 0              | 6(6.00)        | 0                | 0                | 0                  | 0             |
| Longyang | 28            | 2.33    | 3        | 24(85.71)                                   | 0               | 0                 | 0              | 0              | 0                | 2(7.14)          | 2(7.14)            | 0             |
| Lanping  | 22            | 1.83    | 3        | 17(77.27)                                   | 0               | 4(18.18)          | 1(4.55)        | 0              | 0                | 0                | 0                  | 0             |
| Yulong   | 27            | 2.25    | 3        | 23(85.18)                                   | 0               | 2(7.41))          | 0              | 0              | 2(7.41)          | 0                | 0                  | 0             |
| Deqin    | 16            | 1.33    | 1        | 0                                           | 0               | 0                 | 16(100.00)     | 0              | 0                | 0                | 0                  | 0             |
| Total    | 421           | 3.51    | 9        | 278(66.03)                                  | 76(18.05)       | 30(7.13)          | 23(5.46)       | 7(1.66)        | 2(0.48)          | 2(0.48)          | 2(0.48)            | 1(0.24)       |

\*Small mammals density = (abundance/ live traps.nights)×100%, the number of live traps.nights each county is 1200

**Table 2 Distribution for parasitic fleas in households of 10 counties from Western Yunnan Province**

| County   | No. of small mammals | No. of small mammals with flea infection | Flea prevalence (%) <sup>a</sup> | No. of fleas | Flea index <sup>b</sup> | Richness | Parasitic flea species and proportions |                                     |                                              |                                      |                                 |
|----------|----------------------|------------------------------------------|----------------------------------|--------------|-------------------------|----------|----------------------------------------|-------------------------------------|----------------------------------------------|--------------------------------------|---------------------------------|
|          |                      |                                          |                                  |              |                         |          | <i>Xenopsylla</i><br><i>Cheopis</i>    | <i>Leptopsylla</i><br><i>Segnis</i> | <i>Ctenocephalides</i><br><i>felis felis</i> | <i>Monopychllusani</i><br><i>sus</i> | <i>Pulexirrita</i><br><i>ns</i> |
| Yongren  | 86                   | 6                                        | 6.98                             | 83           | 0.97                    | 3        | 71(85.54)                              | 11(13.26)                           | 0                                            | 1(1.20)                              | 0                               |
| Nanhua   | 36                   | 12                                       | 33.33                            | 86           | 2.39                    | 4        | 1(1.16)                                | 61(70.93)                           | 8(9.3)                                       | 0                                    | 16(18.6)                        |
| Xiangyun | 41                   | 21                                       | 51.22                            | 146          | 3.56                    | 2        | 3(2.05)                                | 143(97.95)                          | 0                                            | 0                                    | 0                               |
| Yunxian  | 39                   | 28                                       | 71.79                            | 97           | 2.49                    | 2        | 92(94.85)                              | 5(5.15)                             | 0                                            | 0                                    | 0                               |
| Gengma   | 26                   | 12                                       | 46.15                            | 42           | 1.62                    | 2        | 38(90.48)                              | 0                                   | 0                                            | 4(9.52)                              | 0                               |
| Mangshi  | 100                  | 56                                       | 56.00                            | 250          | 2.50                    | 3        | 208(83.20)                             | 34(13.60)                           | 0                                            | 8(3.20)                              | 0                               |
| Longyang | 28                   | 11                                       | 39.29                            | 41           | 1.46                    | 4        | 16(39.02)                              | 23(56.09)                           | 1(2.44)                                      | 1(2.44)                              | 0                               |
| Lanping  | 22                   | 9                                        | 40.91                            | 49           | 2.23                    | 2        | 0                                      | 45(91.84)                           | 0                                            | 4(8.16)                              | 0                               |
| Yulong   | 27                   | 15                                       | 55.56                            | 198          | 7.33                    | 3        | 0                                      | 152(76.77)                          | 35(17.68)                                    | 11(5.56)                             | 0                               |
| Deqin    | 16                   | 0                                        | 0                                | 0            | 0                       | 0        | 0                                      | 0                                   | 0                                            | 0                                    | 0                               |
| Total    | 421                  | 170                                      | 40.38                            | 992          | 2.36                    | 5        | 429(43.25)                             | 474(47.78)                          | 44(4.44)                                     | 29(2.92)                             | 16(1.61)                        |

<sup>a</sup>Flea prevalence = (No. of small mammals with flea infection/ No. of small mammals)×100%

<sup>b</sup>Flea index = No. of fleas/ No. of small mammals

**Table 3 Flea infection for different small mammal species in households of Western Yunnan Province**

| small mammal species         | No. of small mammals | No. of small mammals with flea infection | Flea prevalence (%) <sup>a</sup> | No. of fleas | Flea index <sup>b</sup> | No. of small mammals with <i>Xenopsylla cheopis</i> | <i>Xenopsylla cheopis</i> prevalence (%) |
|------------------------------|----------------------|------------------------------------------|----------------------------------|--------------|-------------------------|-----------------------------------------------------|------------------------------------------|
| <i>Rattus Tanezumi</i>       | 278                  | 149                                      | 53.60                            | 737          | 2.65                    | 99                                                  | 35.61                                    |
| <i>Mus musculus</i>          | 76                   | 1                                        | 1.32                             | 1            | 0.01                    | 1                                                   | 1.32                                     |
| <i>Rattus norvegicus</i>     | 30                   | 12                                       | 40.00                            | 120          | 4.00                    | 2                                                   | 6.67                                     |
| <i>Rattus nitidus</i>        | 23                   | 2                                        | 8.70                             | 4            | 0.17                    | 1                                                   | 4.35                                     |
| <i>Suncus murinus</i>        | 7                    | 3                                        | 42.86                            | 31           | 4.43                    | 2                                                   | 28.57                                    |
| <i>Apodemus chevrieri</i>    | 2                    | 2                                        | 100                              | 58           | 29.00                   | 0                                                   | 0                                        |
| <i>Crocidura attenuata</i>   | 2                    | 0                                        | 0                                | 0            | 0                       | 0                                                   | 0                                        |
| <i>Anourosorex squamipes</i> | 2                    | 0                                        | 0                                | 0            | 0                       | 0                                                   | 0                                        |
| <i>Mus caroli</i>            | 1                    | 1                                        | 100                              | 41           | 41                      | 1                                                   | 1                                        |
| Total                        | 421                  | 170                                      | 40.38                            | 992          | 2.36                    | 106                                                 | 25.18                                    |

<sup>a</sup>Flea prevalence = (No. of small mammals with flea infection/ No. of small mammals)×100%

<sup>b</sup>Flea index = No. of fleas/ No. of small mammals

**Table 4** The results of the prototype multiple HNB regression model for the abundance of parasitic fleas

| Variables (Factors)    | No. of small mammals | Logistic part    |         | Count part       |         |
|------------------------|----------------------|------------------|---------|------------------|---------|
|                        |                      | OR(95%CI)        | P value | AR(95%CI)        | P value |
| Host species           |                      |                  |         |                  |         |
| <i>Rattus Tanezumi</i> | 270                  | Ref <sup>a</sup> |         | Ref              |         |
| <i>Mus musculus</i>    | 76                   | 0.01(0,0.08)     | 0       | 0(0- +∞)         | 0.959   |
| others                 | 61                   | 0.41(0.22,0.76)  | 0.004   | 4.40(1.70,11.37) | 0.002   |
| Age                    |                      |                  |         |                  |         |
| immaturity             | 114                  | Ref              |         | Ref              |         |
| adult                  | 293                  | 1.71(0.67,4.37)  | 0.265   | 0.33(0.10,1.10)  | 0.071   |
| Gender                 |                      |                  |         |                  |         |
| female                 | 255                  | Ref              |         | Ref              |         |
| male                   | 152                  | 0.81(0.51,1.29)  | 0.377   | 1.47(0.83,2.61)  | 0.183   |
| Body weight (g)        |                      |                  |         |                  |         |
| ≤59                    | 202                  | Ref              |         | Ref              |         |
| >59                    | 205                  | 1.28(0.54,3.04)  | 0.570   | 5.03(1.60,15.82) | 0.006   |
| Body length(cm)        |                      |                  |         |                  |         |
| ≤21                    | 205                  | Ref              |         | Ref              |         |
| >21                    | 202                  | 0.89(0.52,1.52)  | 0.673   | 1.33(0.73,2.44)  | 0.351   |
| Tail length (cm)       |                      |                  |         |                  |         |
| ≤13                    | 201                  | Ref              |         | Ref              |         |
| >13                    | 206                  | 0.82(0.39,1.72)  | 0.603   | 0.55(0.25,1.22)  | 0.140   |

<sup>a</sup>Ref: reference group

**Table 5    The results of the final HNB model for the abundance of parasitic fleas**

| Variables (Factors)    | Logistic part    |         | Count part       |         |
|------------------------|------------------|---------|------------------|---------|
|                        | OR(95%CI)        | P value | AR(95%CI)        | P value |
| <b>Host species</b>    |                  |         |                  |         |
| <i>Rattus Tanezumi</i> | Ref <sup>a</sup> |         | Ref              |         |
| <i>Mus musculus</i>    | 0.01(0,0.07)     | 0.000   | 0.00(0- +∞)      | 0.956   |
| Others                 | 0.42(0.23,0.76)  | 0.004   | 5.71(2.21,14.77) | 0.000   |
| <b>Age</b>             |                  |         |                  |         |
| Immaturity             | Ref              |         | Ref              |         |
| Adult                  | 1.74(1.07,2.81)  | 0.024   | 0.24(0.07,0.80)  | 0.020   |
| <b>Gender</b>          |                  |         |                  |         |
| Female                 |                  |         | Ref              |         |
| Male                   |                  |         | 1.62(0.92,2.84)  | 0.093   |
| <b>Body weight (g)</b> |                  |         |                  |         |
| ≤59                    |                  |         | Ref              |         |
| >59                    |                  |         | 5.03(1.62,15.64) | 0.005   |

<sup>a</sup> Ref: reference group

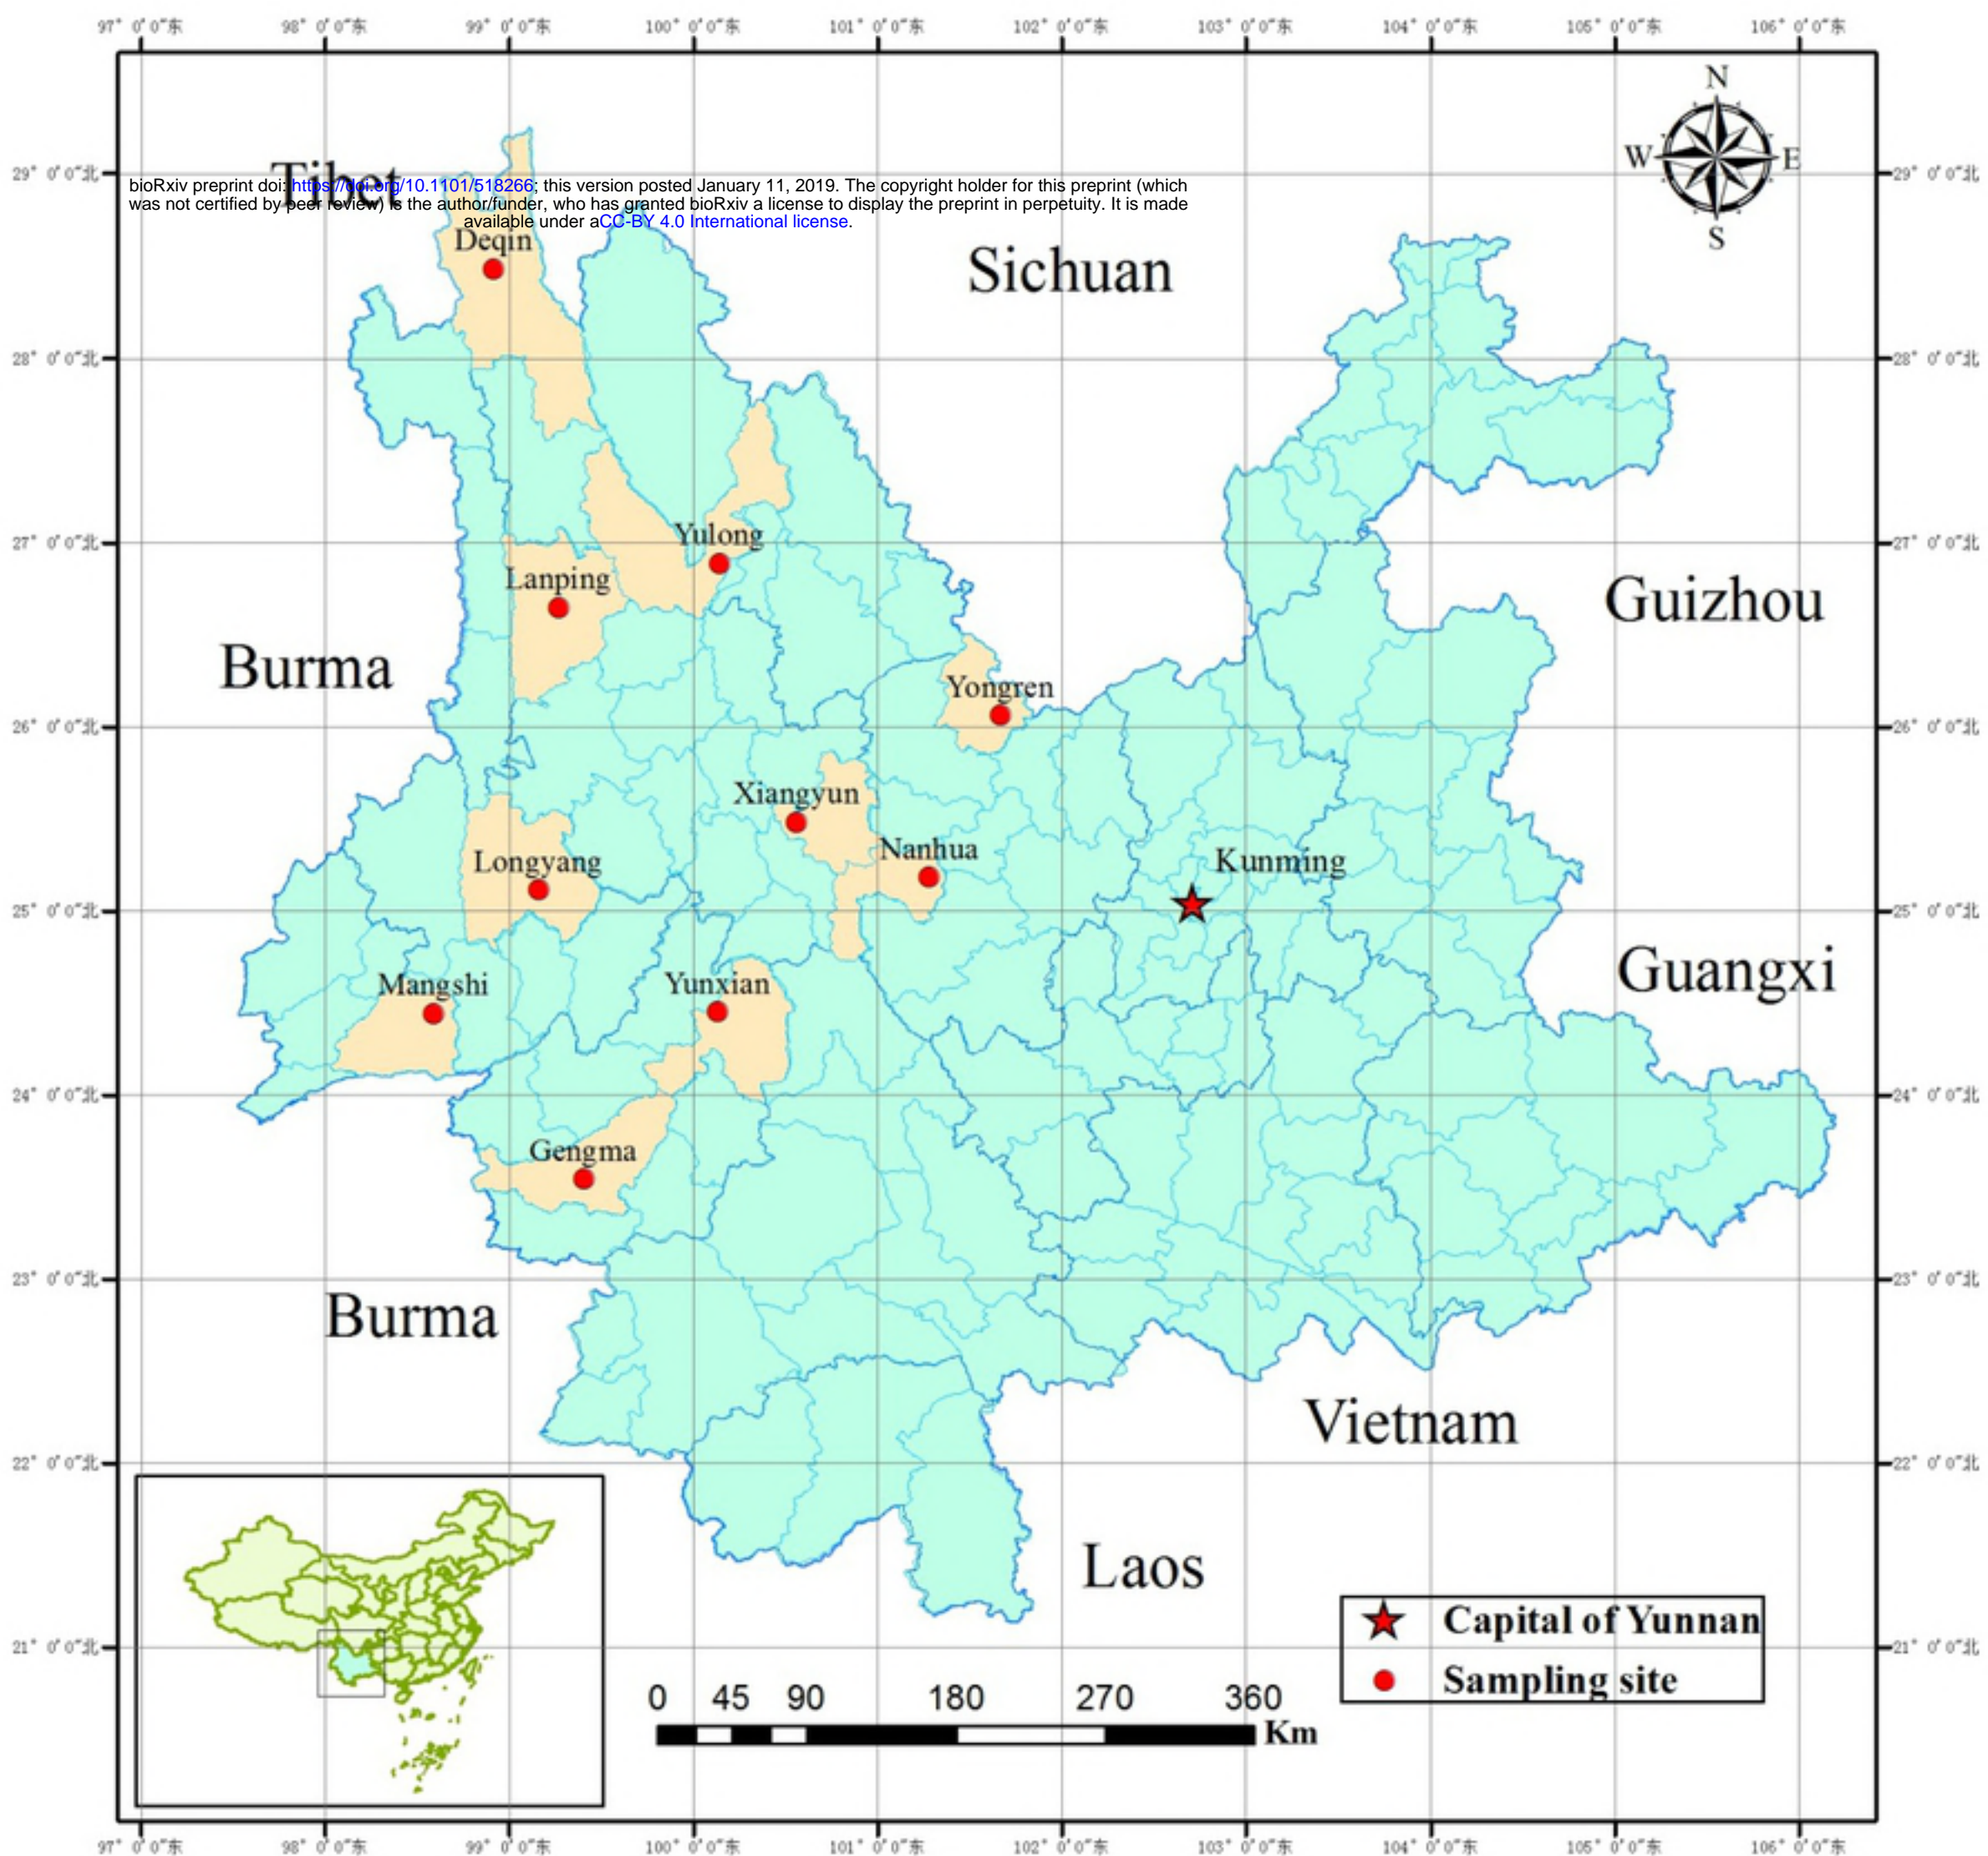

Figure
